# Supplementary material for: Bivalent Vaccine against Streptococcus agalactiae and Aeromonas hydrophila in Nile Tilapia (Oreochromis niloticus): A Laboratory-Phase and Large-Scale Study
Source: MDPI journal article supplement (doi:10.3390/ani13213338), 2023-10-26
Supplement: s1 [file s1]

**Table S1.** External and internal physical characteristics and behavior characteristics analyzed in the post-vaccination and post-infection periods and in necropsy, in control and vaccinated groups. dpv = days post-vaccination; dpi = days post-infection; C = control group; V = vaccinated group.

| Clinical signs                  | 1<br>dpv | 1<br>dpi | 4dpi | 5<br>dpi | 6<br>dpi | 7<br>dpi | 12<br>dpi | 15<br>dpi | 17<br>dpi | 18<br>dpi | 20<br>dpi | 21<br>dpi | 22<br>dpi | 29<br>dpi | 30<br>dpi | Necro<br>psy |
|---------------------------------|----------|----------|------|----------|----------|----------|-----------|-----------|-----------|-----------|-----------|-----------|-----------|-----------|-----------|--------------|
| Anorexia                        |          |          |      |          |          |          |           |           |           |           |           |           |           |           |           | C            |
| Exophthalmos                    |          |          |      |          |          |          |           |           |           |           |           |           |           |           |           |              |
| Abdominal<br>distension         |          |          |      |          |          |          |           |           |           |           |           |           | C         |           |           | C            |
| Erratic swimming                |          |          |      |          |          |          |           |           | C         |           |           |           |           |           |           |              |
| Skin lesions                    |          |          | C    | C        | C        | C        |           |           |           |           |           |           | C         |           |           |              |
| Opaque eyes                     |          |          |      |          |          |          |           |           | C         |           |           |           | C         |           |           |              |
| Skin darkening                  |          |          |      |          |          |          |           |           | C         |           |           |           |           |           |           |              |
| Lethargy                        |          |          |      |          |          |          |           |           |           |           | C         |           |           | C         |           |              |
| Hemorrhage                      |          |          |      |          | C        | C        |           |           |           |           |           |           | C         | C         |           |              |
| Hemorrhagic lesions             |          |          |      |          |          |          |           |           |           |           |           |           | C         | C         |           |              |
| Fins Erosion                    |          |          |      |          |          |          |           |           | C         |           |           |           |           | C         |           |              |
| Ulceration                      |          |          |      |          |          |          |           |           |           |           |           |           |           |           |           |              |
| Peeling                         |          |          |      |          |          |          |           |           |           |           |           |           |           | C         | C         |              |
| Low food intake                 | VC       | VC       |      |          |          |          |           |           |           |           |           |           |           |           | C         |              |
| Fluid in the visceral<br>cavity |          |          |      |          |          |          |           |           |           |           |           |           |           |           |           | C            |
| Gills necrosis                  |          |          |      |          |          |          |           |           |           |           |           |           |           |           |           | C            |
| Alter in organ color            |          |          |      |          |          |          |           |           |           |           |           |           |           |           |           | C            |
| Alter in organ size             |          |          |      |          |          |          |           |           |           |           |           |           |           |           |           |              |
| Organ deterioration             |          |          |      |          |          |          |           |           |           |           |           |           |           |           |           | C            |
| Death                           |          |          |      |          |          |          | C         | C         |           | V         |           | C         | C         |           | C         |              |
